# Supplementary material
Source: publisher figshare collection journal article supplement (https://aacr.figshare.com/articles/dataset/_/23641389)
Supplement: Supplementary file 1 [file 41480655]

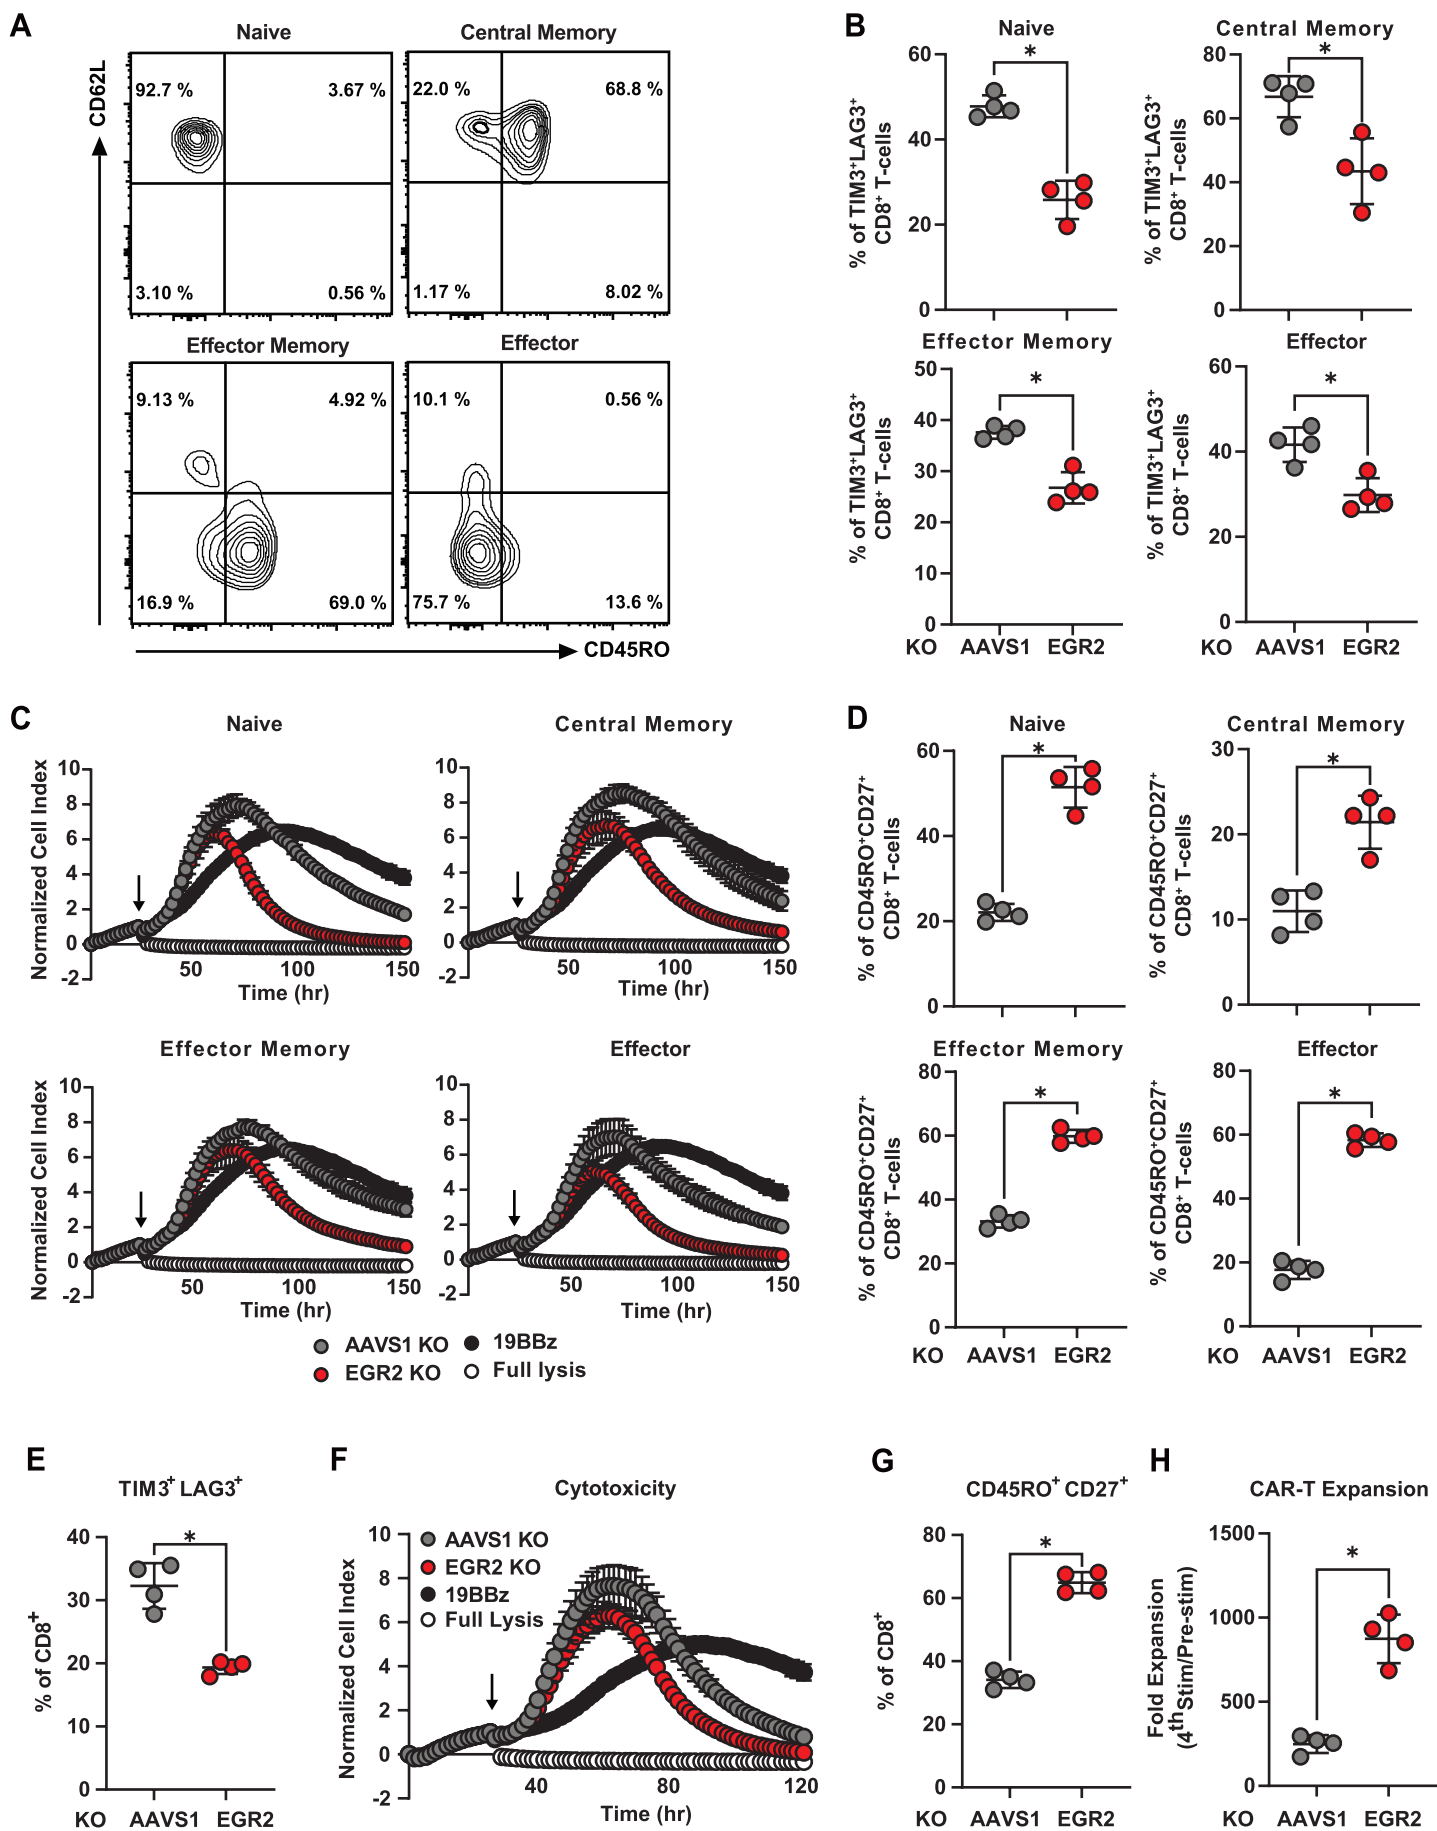

**Supplementary Figure 3. Impact of *EGR2* knockout on different T-cell subsets and CD28-based CAR T-cells.** **A**, Naive, central memory, effector memory, and effector T-cells were magnetically isolated. PSMA CAR-T cells with *AAVS1* and *EGR2* knockout (KO) were then generated from the T-cell subsets and restimulation experiments were conducted to examine the development of exhaustion and memory. **B**, Expression of exhaustion markers (TIM3<sup>+</sup>LAG3<sup>+</sup>), **C**, cytotoxicity and **D**, expression of early memory markers (CD45RO<sup>+</sup>CD27<sup>+</sup>) after chronic CAR stimulation. **(E-H)** *EGR2* was deleted in PSMA-CD28 based CAR T-cells, and the immunophenotype of CAR T-cells was assessed during the restimulation assay. **E**, Expression of exhaustion markers (TIM3<sup>+</sup>LAG3<sup>+</sup>), **F**, cytotoxicity, **G**, expression of early memory markers (CD45RO<sup>+</sup>CD27<sup>+</sup>) after chronic CAR stimulation and **H**, CAR T-cell expansion capacity during restimulation. All experiments were conducted using T-cells from two independent healthy donors, and panels **(A-H)** are representative data from one donor. (Mann-Whitney test,  $n = 4$ ). \* $P < 0.05$ , \*\* $P < 0.01$ , \*\*\* $P < 0.001$ , ns.: not significant.
